# Supplementary material for: Revisiting Bevacizumab + Cytotoxics Scheduling Using Mathematical Modeling: Proof of Concept Study in Experimental Non‐Small Cell Lung Carcinoma
Source: PubMed Central journal article supplement — CPT Pharmacometrics Syst Pharmacol. 2017 Dec 7;7(1):42–50. doi: 10.1002/psp4.12265 (PMC5784740; doi:10.1002/psp4.12265), 2017-12-07
Supplement: PSP4-7-42-s002.pdf [file PSP4-7-42-s002.pdf]

# Supplementary Figures

**Figure S1: Design of experiments -1 and -2**

**Figure S2: Pharmacokinetic profiles**

**Figure S3: Visual predictive checks of the Monolix fit**

**Figure S4: Monolix fit vs median data**

**Figure S5: Individual fits of the animal that had the most important contribution to the likelihood**

**Figure S6: Adapted fit vs median data**

**Figure S7: Residual analysis for experiment-1 population analysis**

**Figure S8: Individual tumor growth simulations**

**Figure S1: Design of experiments -1 and -2**

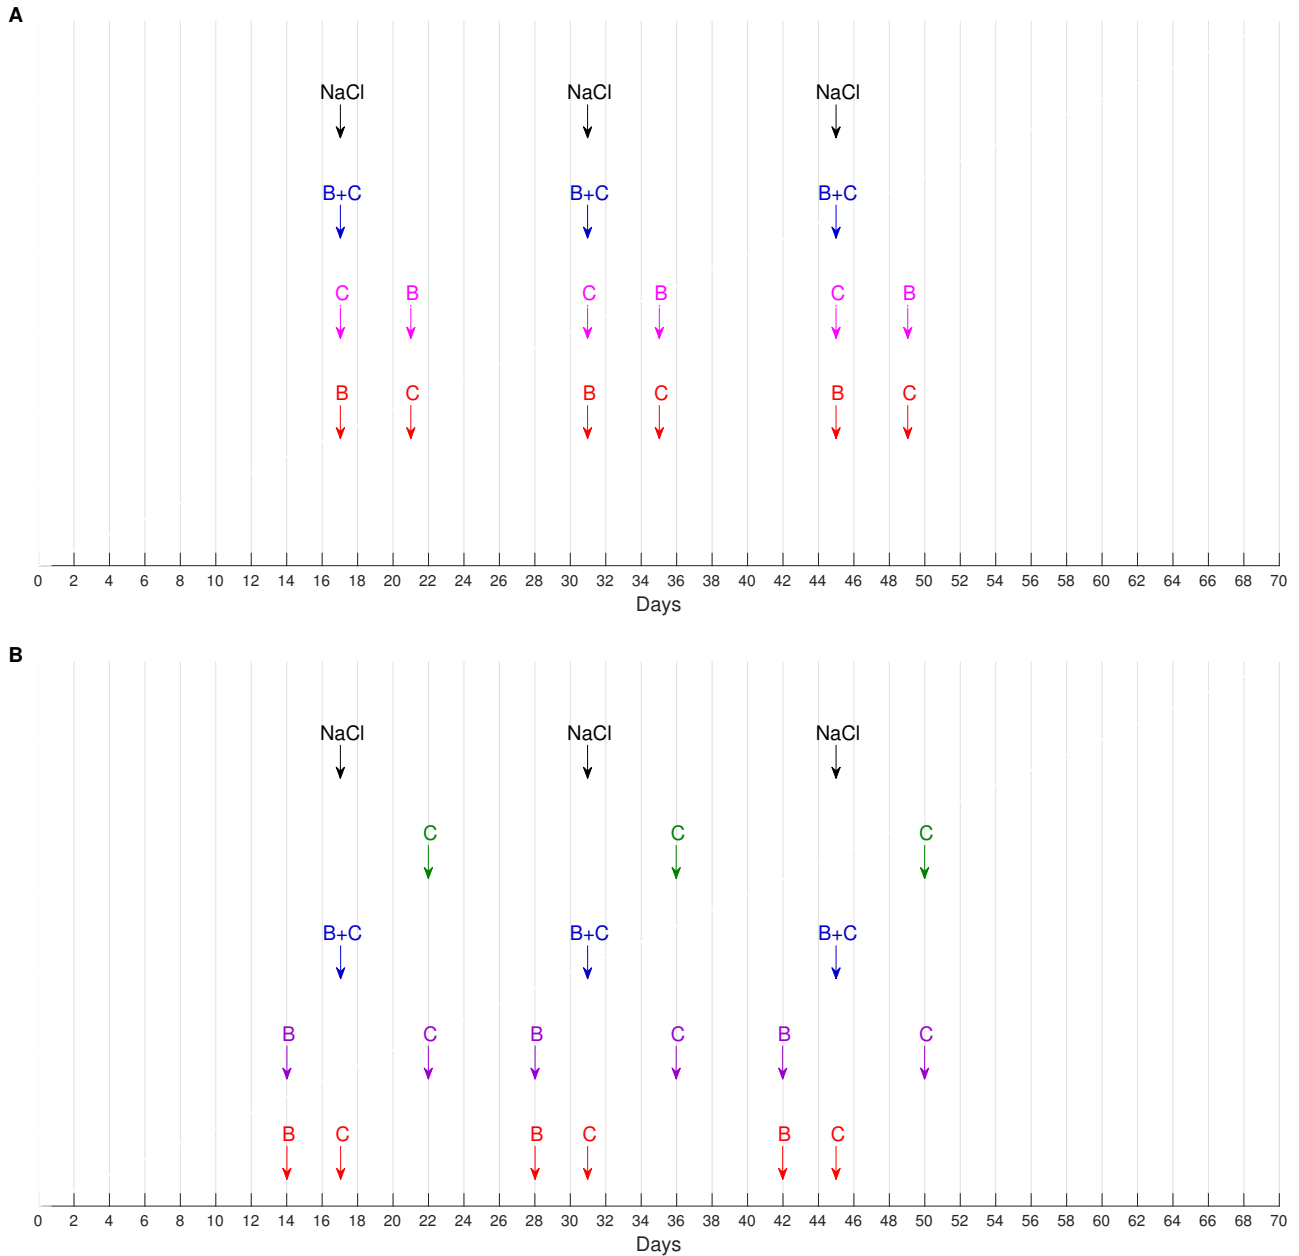

Arrows indicate administration time.

A- Experiment-1 : Black arrows: Control group. Blue arrows: Concomitant group ("Beva + Chemo"). Magenta arrows: Reversed group with cytotoxics administered 4 days before bevacizumab ("Chemo then Beva 4 days"). Red arrows: Sequential group with bevacizumab administered 4 days before cytotoxics ("Beva then Chemo 4 days").

B- Experiment-2 : Black arrows: Control group. Green arrows: Cytotoxics only group (Chemo). Blue arrows: Concomitant group ("Beva + Chemo"). Purple arrows: Aberrant sequential group with bevacizumab administered 8 days before cytotoxics ("Beva then Chemo 8 days"). Red arrows: Optimized sequential group with bevacizumab administered 3 days before cytotoxics ("Beva then Chemo 3 days")

**Figure S2: Pharmacokinetic profiles**

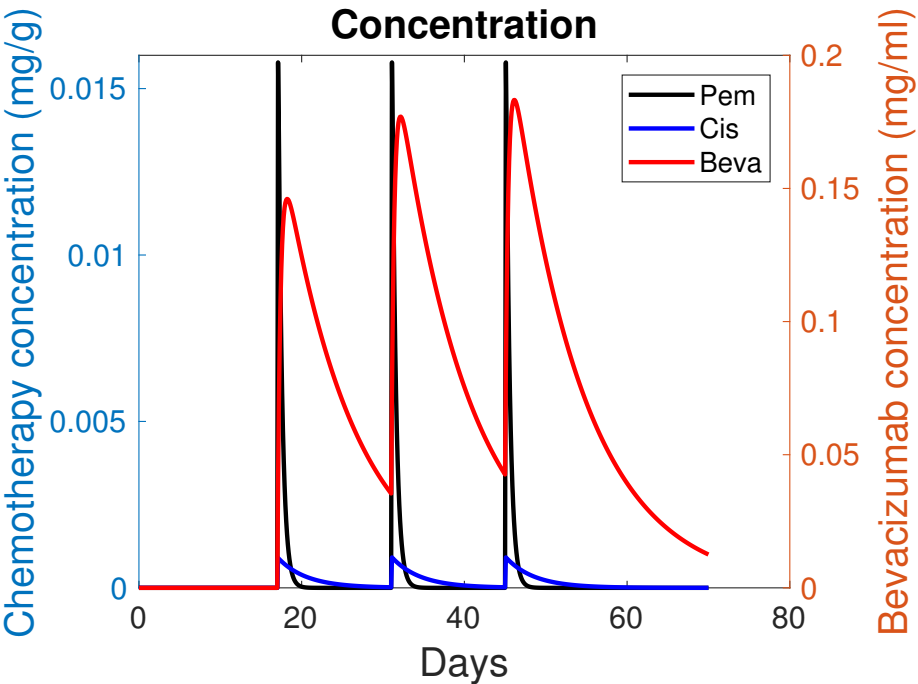

Pharmacokinetics profile of bevacizumab (red line), pemetrexed (black line) and cisplatin (blue line) for 3 treatment cycles (intra-peritoneal injections of 20, 100 and 3 mg/kg for bevacizumab, pemetrexed and cisplatin respectively).

**Figure S3: Visual predictive checks of the Monolix fit**

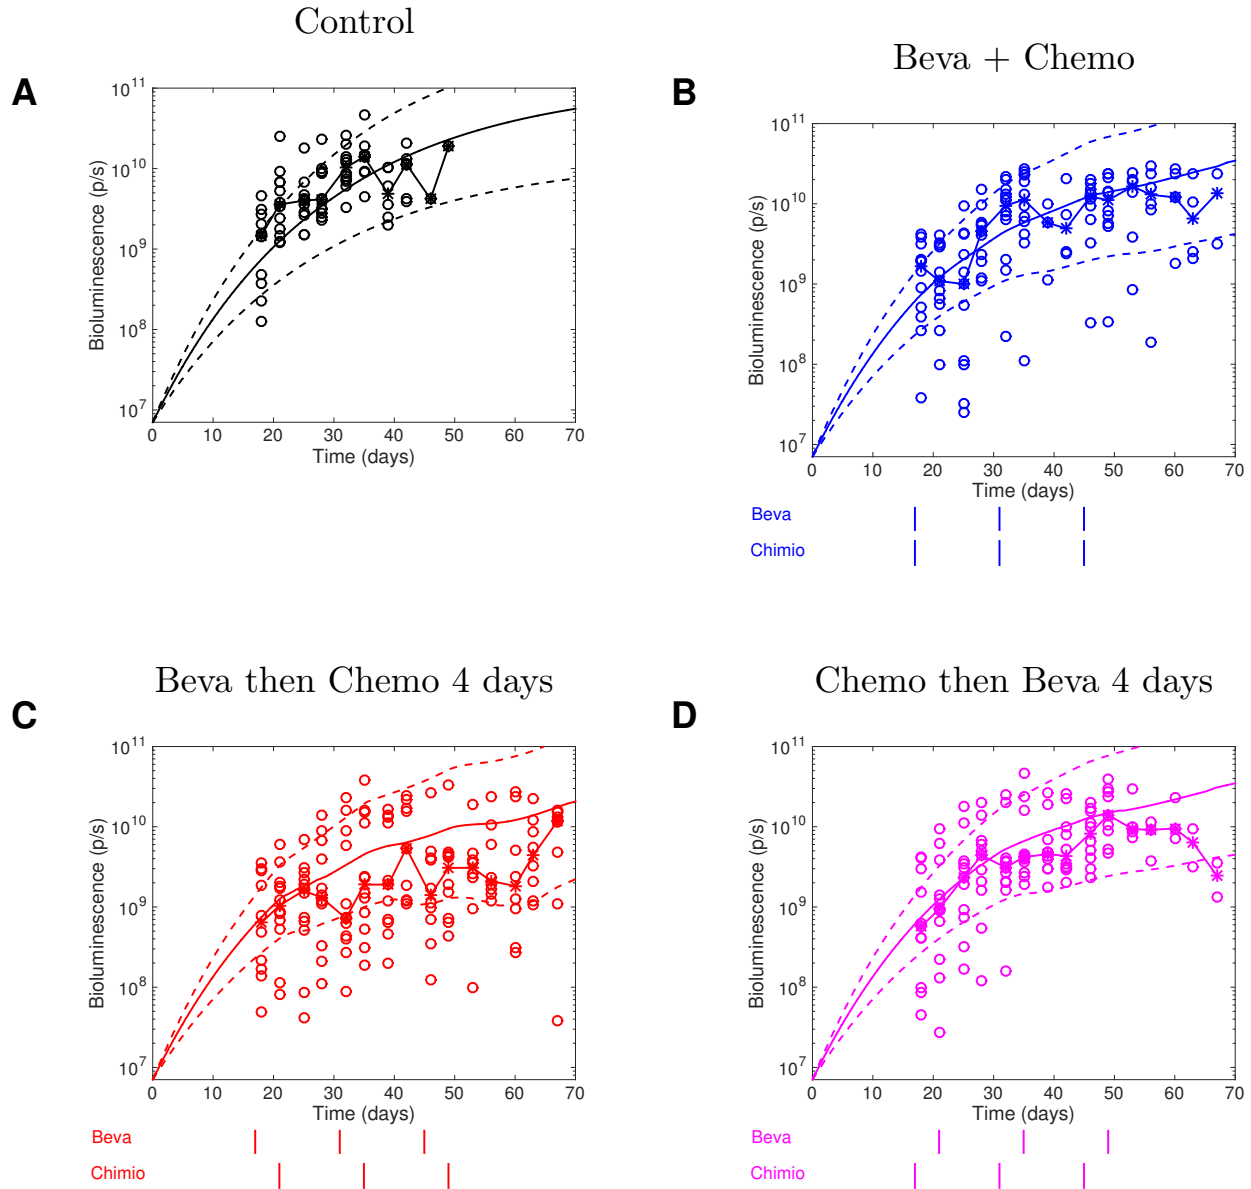

Visual predictive checks of the initial Monolix fit shows lack of descriptive power, especially for the “Beva then Chemo 4 days” group.

Circles: experimental data. Stars with broken lines: median data. Solid lines: tumor growth simulated curves using median parameter values, dashed lines: 95% intervals for inter-animal variability, generated from the simulation of 1000 virtual animals with parameters distributed according to the distribution estimated by the mixed-effects fit.

**Figure S4: Monolix fit vs median data**

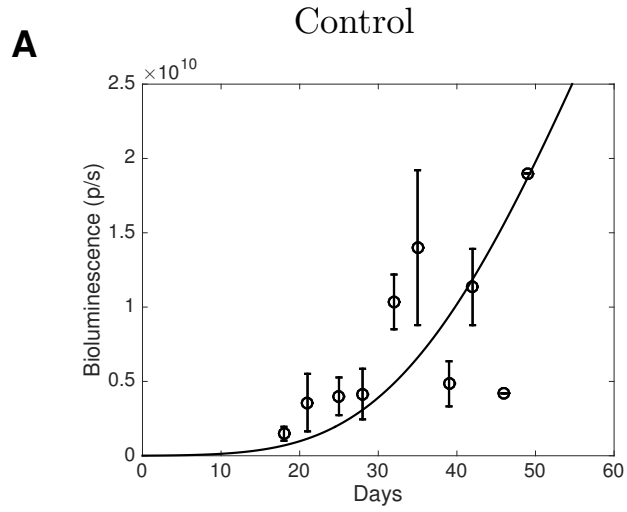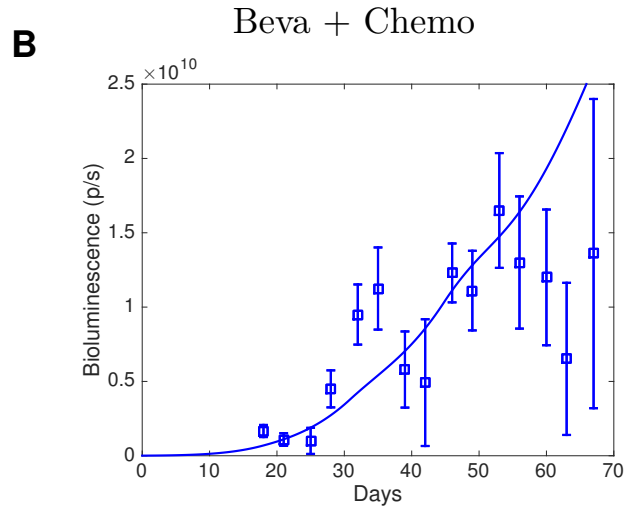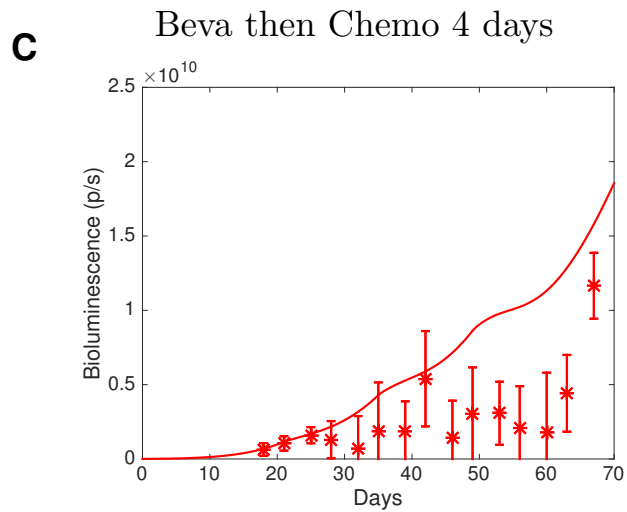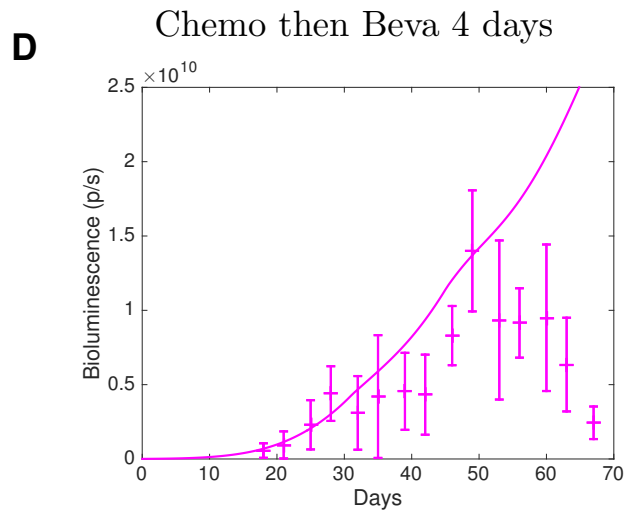

**Figure S5: Individual fits of the animal that had the most important contribution to the likelihood**

**Animal 8 Beva then Chemo 4 days**

**Monolix fit**

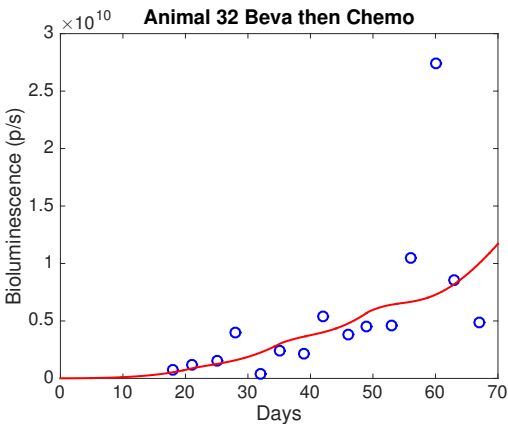

**Adapted fit**

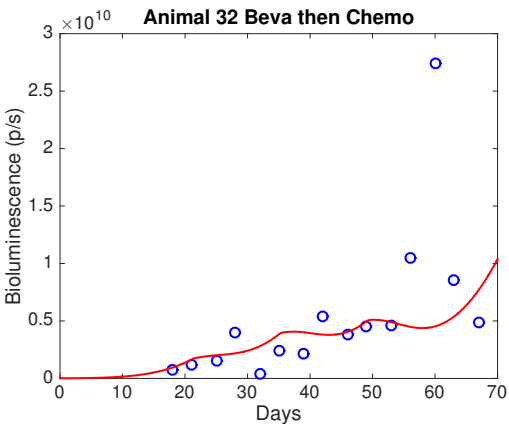

**Figure S6: Adapted fit vs median data**

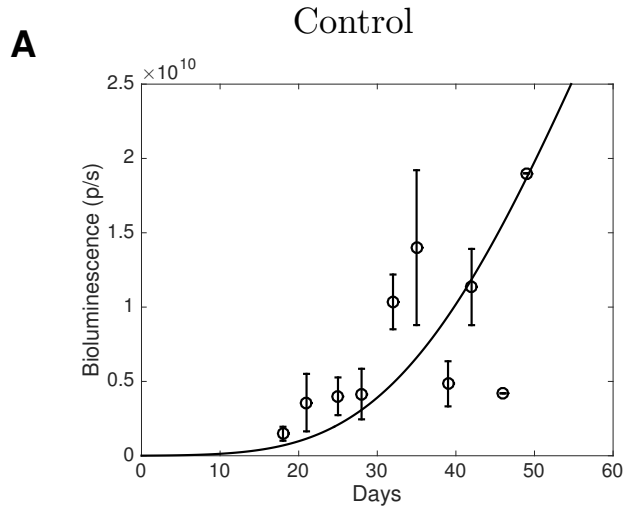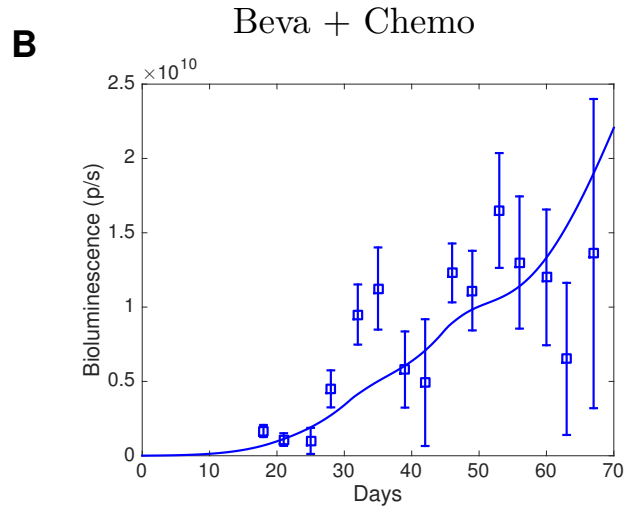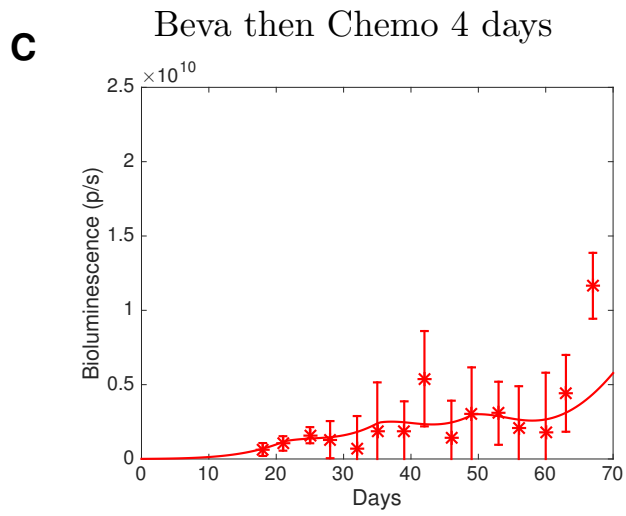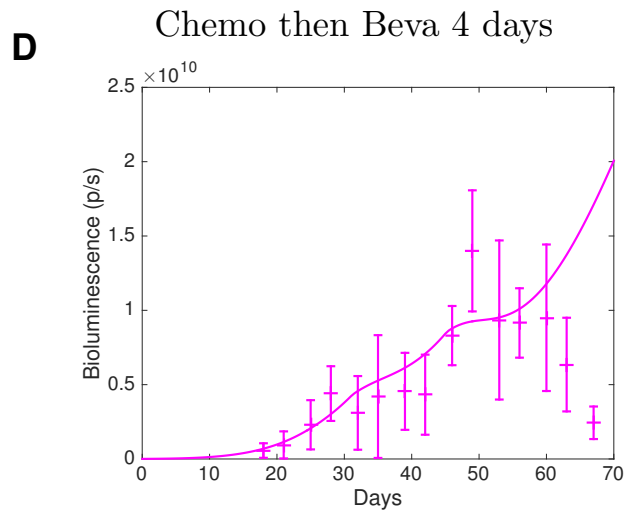

**Figure S7: Residual analysis for experiment-1 population analysis**

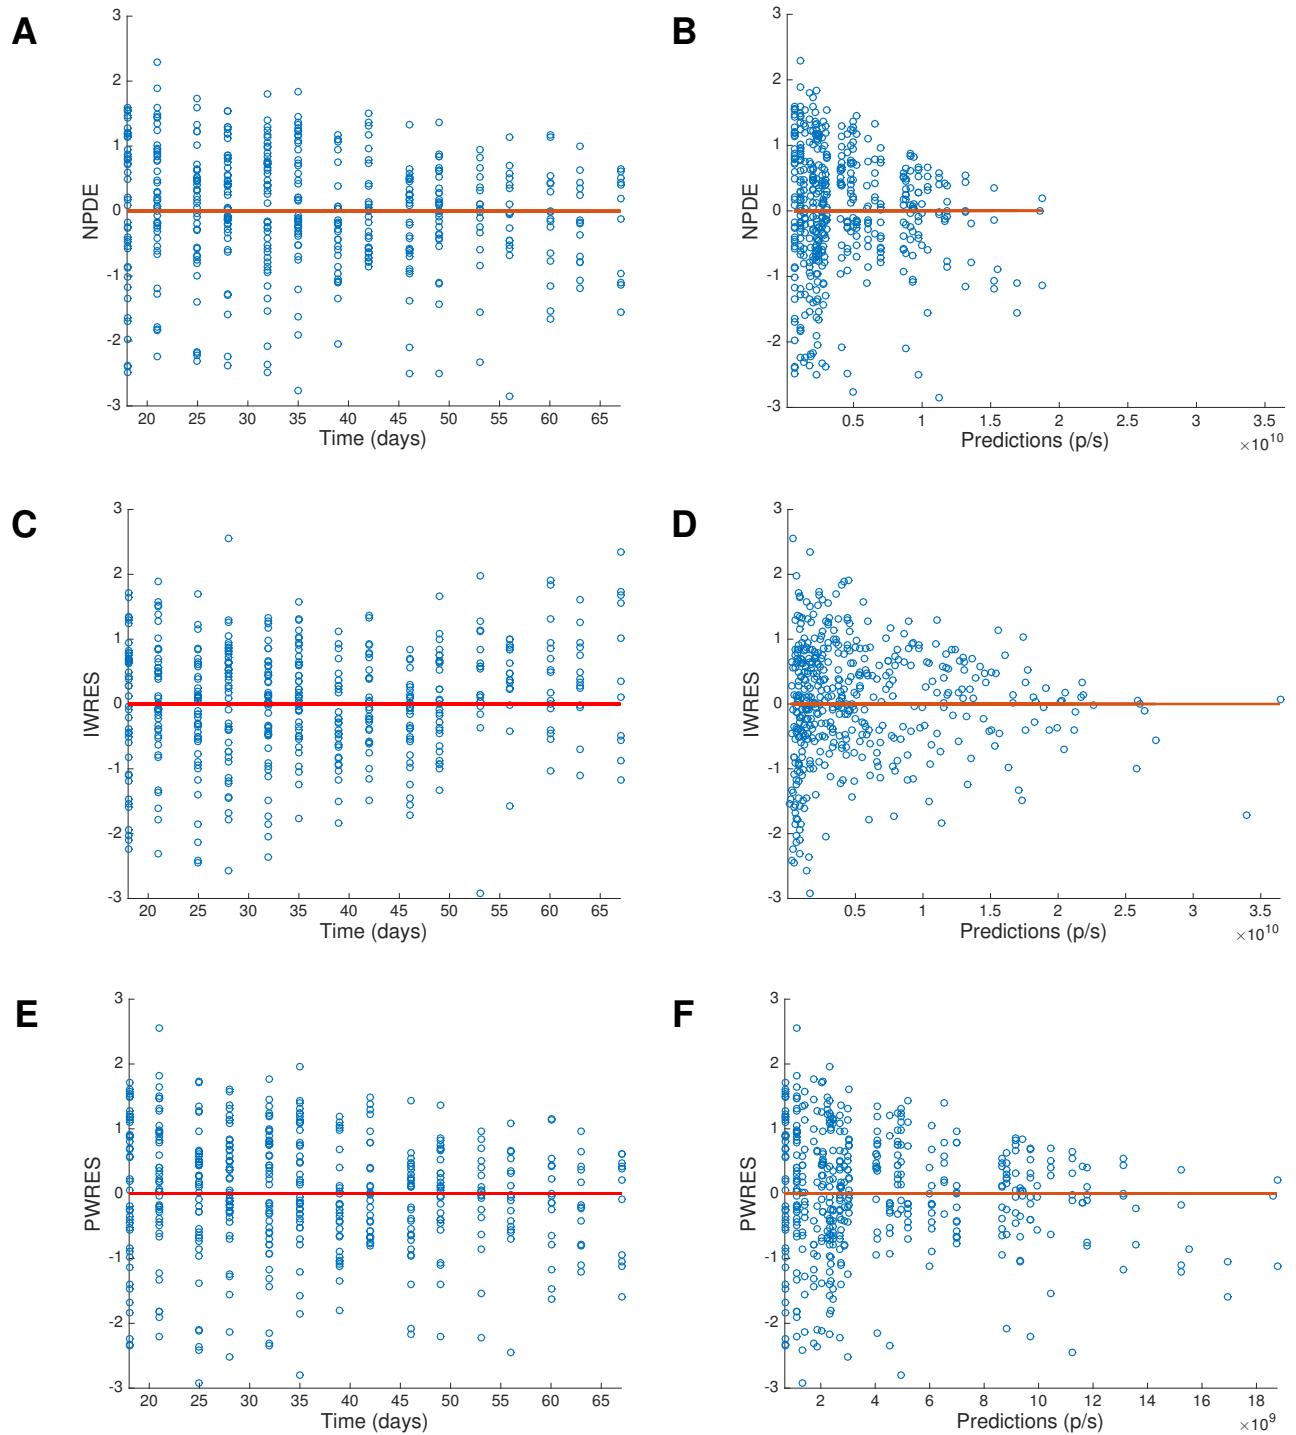

A- Normalized Predictions Distribution Errors (NPDE) vs. time  
B- Normalized Predictions Distribution Errors (NPDE) vs. predictions  
C- Individual Weighted Residuals (IWRES) vs. time  
D- Individual Weighted Residuals (IWRES) vs. predictions  
E- Population Weighted Residuals (PWRES) vs. time  
F- Population Weighted Residuals (PWRES) vs. predictions  
Plots were generated using residuals exported from Monolix.



**Figure S8: Individual tumor growth simulations**

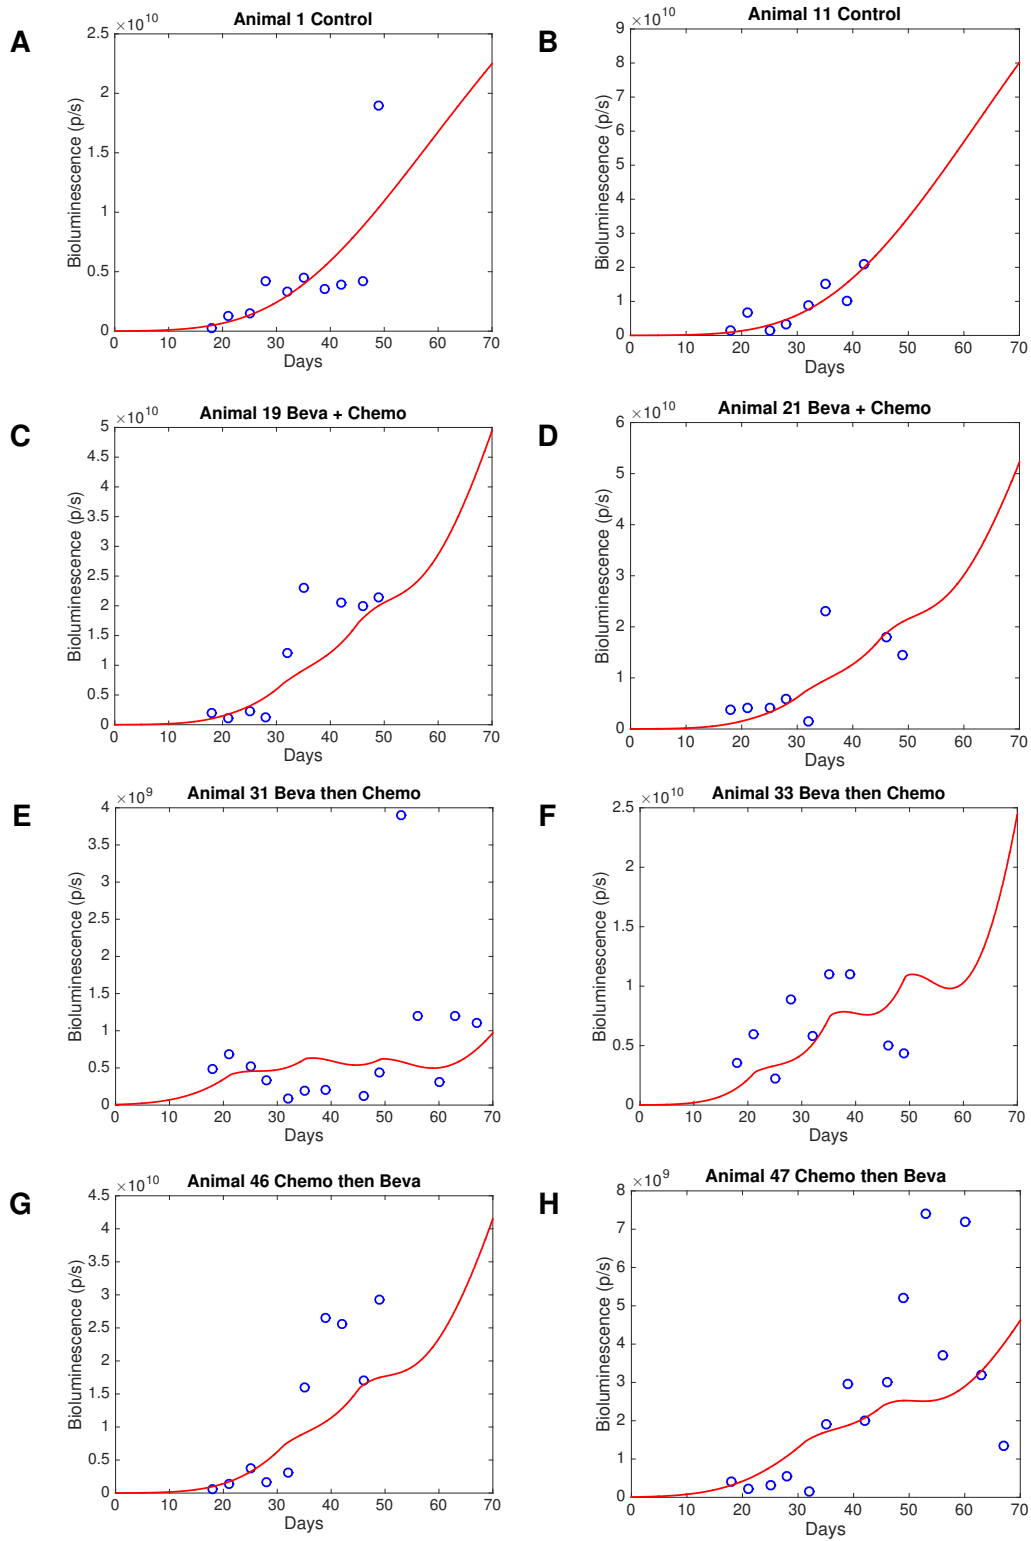

Individual tumor growth simulations of random subjects from experiment-1.  
Blue circles: experimental data. Red lines: simulated tumor growth curves
